# Supplementary material for: Identification of a Novel Therapeutic Target against XDR Salmonella Typhi H58 Using Genomics Driven Approach Followed Up by Natural Products Virtual Screening
Source: MDPI journal article supplement (doi:10.3390/microorganisms9122512), 2021-12-03
Supplement: s1 [file s1]

Supplementary Table S1: Proteins involved in Unique metabolic pathways

| S. No | Unique Metabolic Pathways  | Pathways ID | No. of Proteins | Proteins Names                                                                                                                                                                                                                                                                                                                                                                                                                                                                                                                                                                                                                                                                                                                                                                                                                                                                                                                                                                                                                                                                                                                                                                                                                                                                                |
|-------|----------------------------|-------------|-----------------|-----------------------------------------------------------------------------------------------------------------------------------------------------------------------------------------------------------------------------------------------------------------------------------------------------------------------------------------------------------------------------------------------------------------------------------------------------------------------------------------------------------------------------------------------------------------------------------------------------------------------------------------------------------------------------------------------------------------------------------------------------------------------------------------------------------------------------------------------------------------------------------------------------------------------------------------------------------------------------------------------------------------------------------------------------------------------------------------------------------------------------------------------------------------------------------------------------------------------------------------------------------------------------------------------|
| 1     | Bacterial secretion system | sty03070    | 36              | outer membrane protein TolC<br>pathogenicity island protein<br>pathogenicity 1 island effector protein<br>outer membrane secretory protein<br>pathogenicity island lipoprotein<br>type III secretion protein ssaS<br>type III secretion protein yscR<br>type III secretion protein ssaT<br>type III secretion protein invA<br>type III secretion ATP synthase<br>type III secretion protein ssaN<br>type III secretion protein ssaQ<br>type III secretion protein ssaV<br>type III secretion protein<br>surface presentation of antigens protein<br>protein-export membrane protein SecD<br>protein-export membrane protein SecF<br>preprotein translocase subunit SecE<br>protein-export membrane protein<br>preprotein translocase subunit<br>hypothetical protein<br>membrane protein insertase<br>preprotein translocase subunit SecA<br>cell division protein FtsY<br>protein-export protein SecB<br>signal recognition particle protein<br>sec-independent protein translocase protein tatA<br>sec-independent protein translocase protein tatB<br>sec-independent protein translocase protein tatC<br>sec-independent protein translocase protein tatE<br>Rhs-family protein<br>hypothetical protein<br>type VI secretion protein HCP<br>lipoprotein<br>type VI secretion protein impK |

|   |                      |          |     | ClpB-like protein                                                                                                                                                                                                                                                                                                                                                                                                                                                                                                                                                                                                                                                                                                                                                                                                                                                                                                                                                                                                                                                                                                                                                                                                                                                                                                                                                                                                                                                                                                                                                                                                                        |
|---|----------------------|----------|-----|------------------------------------------------------------------------------------------------------------------------------------------------------------------------------------------------------------------------------------------------------------------------------------------------------------------------------------------------------------------------------------------------------------------------------------------------------------------------------------------------------------------------------------------------------------------------------------------------------------------------------------------------------------------------------------------------------------------------------------------------------------------------------------------------------------------------------------------------------------------------------------------------------------------------------------------------------------------------------------------------------------------------------------------------------------------------------------------------------------------------------------------------------------------------------------------------------------------------------------------------------------------------------------------------------------------------------------------------------------------------------------------------------------------------------------------------------------------------------------------------------------------------------------------------------------------------------------------------------------------------------------------|
| 2 | Two-component system | sty02020 | 167 | <p>phosphate regulon sensor protein PhoR</p> <p>phosphate regulon transcriptional regulatory protein PhoB</p> <p>phosphate ABC transporter substrate-binding protein</p> <p>sensor protein PhoQ</p> <p>transcriptional regulator PhoP</p> <p>outer membrane invasion protein pagC</p> <p>hypothetical protein pagO</p> <p>outer membrane virulence protein pagD</p> <p>outer membrane protease E pgtE</p> <p>nonspecific acid phosphatase phoN</p> <p>two-component sensor kinase EnvZ</p> <p>two-component response regulator OmpR</p> <p>outer membrane protein C</p> <p>outer membrane protein F</p> <p>two component sensor kinase rstB</p> <p>two-component response regulator rstA</p> <p>two-component sensor kinase cpxA</p> <p>two-component response regulatory protein cpxR</p> <p>efflux system protein</p> <p>protease DO</p> <p>two-component sensor kinase creC</p> <p>two-component response regulator creB</p> <p>two-component system sensor kinase baeS</p> <p>two-component system response regulator baeR</p> <p>efflux pump acrD</p> <p>transporter protein mdtD</p> <p>two-component sensor kinase basS</p> <p>RND-family transporter protein dtB</p> <p>efflux pump mdtA</p> <p>two-component response regulator basR</p> <p>two-component system sensor histidine kinase qseC</p> <p>two-component system response regulator qseB</p> <p>flagellar transcriptional activator FlhD</p> <p>flagellar transcriptional activator flhC</p> <p>flagellin fliC</p> <p>motility protein A</p> <p>lipopolysaccharide biosynthesis protein arnB</p> <p>RNA polymerase sigma transcription factor for flagellar operon</p> |

|  |  |  |                                                                                                                                                                                                                                                                                                                                                                                                                                                                                                                                                                                                                                                                                                                                                                                                                                                                                                                                                                                                                                                                                                                                                                                                                                                                                                                                                                                                                                                                                                                                                                                                                                                                                                                                                 |
|--|--|--|-------------------------------------------------------------------------------------------------------------------------------------------------------------------------------------------------------------------------------------------------------------------------------------------------------------------------------------------------------------------------------------------------------------------------------------------------------------------------------------------------------------------------------------------------------------------------------------------------------------------------------------------------------------------------------------------------------------------------------------------------------------------------------------------------------------------------------------------------------------------------------------------------------------------------------------------------------------------------------------------------------------------------------------------------------------------------------------------------------------------------------------------------------------------------------------------------------------------------------------------------------------------------------------------------------------------------------------------------------------------------------------------------------------------------------------------------------------------------------------------------------------------------------------------------------------------------------------------------------------------------------------------------------------------------------------------------------------------------------------------------|
|  |  |  | <p> sensor protein KdpD<br/> KDP operon transcriptional regulatory protein<br/> potassium-transporting ATPase subunit A<br/> potassium-transporting ATPase subunit B<br/> potassium-transporting ATPase subunit C<br/> two-component sensor protein histidine<br/> protein kinase<br/> trimethylamine-N-oxide reductase<br/> chaperone protein TorD<br/> aerobic respiration control sensor protein<br/> global response regulator<br/> two-component system sensor kinase tctE<br/> hypothetical protein tctA<br/> hypothetical protein tctB<br/> hypothetical protein tctC<br/> chromosomal replication initiator protein dnaA<br/> D-alanyl-D-alanine dipeptidase vanX<br/> citrate lyase acyl carrier protein citD<br/> citrate lyase subunit beta citE<br/> citrate lyase subunit alpha<br/> apo-citrate lyase phosphoribosyl-dephospho-CoA transferase<br/> phosphoribosyl-dephospho-CoA transferase citX<br/> 2-(5"-triphosphoribosyl)-3'-dephosphocoenzyme-A synthase<br/> triphosphoribosyl-dephospho-CoA transferase CitG<br/> citrate carrier citT<br/> two-component sensor kinase dcuS<br/> two-component response regulator dcuR<br/> anaerobic C4-dicarboxylate transporter dcuB<br/> NAD-linked malic enzyme; malate oxidoreductase<br/> nitrate/nitrite sensor protein NarX<br/> nitrate/nitrite sensor protein NarQ<br/> respiratory nitrate reductase 1 subunit gamma<br/> respiratory nitrate reductase 2 subunit gamma<br/> respiratory nitrate reductase 1 subunit delta<br/> respiratory nitrate reductase 2 subunit delta<br/> fumarate reductase, flavoprotein subunit frdA<br/> fumarate reductase, iron-sulfur protein frdB<br/> fumarate reductase complex subunit C<br/> fumarate reductase complex subunit D </p> |
|--|--|--|-------------------------------------------------------------------------------------------------------------------------------------------------------------------------------------------------------------------------------------------------------------------------------------------------------------------------------------------------------------------------------------------------------------------------------------------------------------------------------------------------------------------------------------------------------------------------------------------------------------------------------------------------------------------------------------------------------------------------------------------------------------------------------------------------------------------------------------------------------------------------------------------------------------------------------------------------------------------------------------------------------------------------------------------------------------------------------------------------------------------------------------------------------------------------------------------------------------------------------------------------------------------------------------------------------------------------------------------------------------------------------------------------------------------------------------------------------------------------------------------------------------------------------------------------------------------------------------------------------------------------------------------------------------------------------------------------------------------------------------------------|

|  |  |  |                                                                                                                                                                                                                                                                                                                                                                                                                                                                                                                                                                                                                                                                                                                                                                                                                                                                                                                                                                                                                                                                                                                                                                                                                                                                                                                                                                                                                                                                                                                                                                                                                                                                                                  |
|--|--|--|--------------------------------------------------------------------------------------------------------------------------------------------------------------------------------------------------------------------------------------------------------------------------------------------------------------------------------------------------------------------------------------------------------------------------------------------------------------------------------------------------------------------------------------------------------------------------------------------------------------------------------------------------------------------------------------------------------------------------------------------------------------------------------------------------------------------------------------------------------------------------------------------------------------------------------------------------------------------------------------------------------------------------------------------------------------------------------------------------------------------------------------------------------------------------------------------------------------------------------------------------------------------------------------------------------------------------------------------------------------------------------------------------------------------------------------------------------------------------------------------------------------------------------------------------------------------------------------------------------------------------------------------------------------------------------------------------|
|  |  |  | <p> regulatory protein uhpC;<br/> two-component system sensor histidine<br/> kinase uhpB<br/> Two-component system response regulator<br/> uhpA<br/> hexosephosphate transport protein uhpT<br/> RcsF protein<br/> sensor protein RcsC<br/> two-component system sensor kinase rcsD<br/> colanic acid capsular biosynthesis activation<br/> protein A<br/> capsule synthesis protein B regulatory protein<br/> sensor protein barA<br/> invasion response-regulator uvrY<br/> cell-division regulatory protein sdiA<br/> carbon storage regulator csrA<br/> transcriptional regulator fimZ<br/> [protein-P<sub>II</sub>] uridylyltransferase glnD<br/> nitrogen regulatory protein P-II glnB<br/> two-component system sensory histidine<br/> kinase glnL<br/> two-component system response regulator<br/> glnG<br/> glutamine synthetase glnA<br/> two-component system sensor protein zraS<br/> transcriptional regulator<br/> TonB-dependent outer membrane siderophore<br/> receptor protein<br/> ferrienterobactin receptor<br/> sensor kinase DpiB<br/> sensor kinase Cita<br/> transcriptional regulator CriR<br/> transcriptional regulator Citb<br/> [citrate (pro-3S)-lyase] ligase<br/> nitrate/nitrite response regulator protein NarL<br/> nitrate/nitrite response regulator protein NarP<br/> respiratory nitrate reductase 1 subunit alpha<br/> respiratory nitrate reductase 2 subunit alpha<br/> respiratory nitrate reductase 1 subunit beta<br/> respiratory nitrate reductase 2 subunit beta<br/> fumarate reductase complex subunit D<br/> sensor protein RcsC<br/> invasion response-regulator<br/> cell-division regulatory protein<br/> transcriptional regulator </p> |
|--|--|--|--------------------------------------------------------------------------------------------------------------------------------------------------------------------------------------------------------------------------------------------------------------------------------------------------------------------------------------------------------------------------------------------------------------------------------------------------------------------------------------------------------------------------------------------------------------------------------------------------------------------------------------------------------------------------------------------------------------------------------------------------------------------------------------------------------------------------------------------------------------------------------------------------------------------------------------------------------------------------------------------------------------------------------------------------------------------------------------------------------------------------------------------------------------------------------------------------------------------------------------------------------------------------------------------------------------------------------------------------------------------------------------------------------------------------------------------------------------------------------------------------------------------------------------------------------------------------------------------------------------------------------------------------------------------------------------------------|

|  |  |  |                                                                                                                                                                                                                                                                                                                                                                                                                                                                                                                                                                                                                                                                                                                                                                                                                                                                                                                                                                                                                                                                                                                                                                                                                                                                                                                                                                                                                                                                                                                                       |
|--|--|--|---------------------------------------------------------------------------------------------------------------------------------------------------------------------------------------------------------------------------------------------------------------------------------------------------------------------------------------------------------------------------------------------------------------------------------------------------------------------------------------------------------------------------------------------------------------------------------------------------------------------------------------------------------------------------------------------------------------------------------------------------------------------------------------------------------------------------------------------------------------------------------------------------------------------------------------------------------------------------------------------------------------------------------------------------------------------------------------------------------------------------------------------------------------------------------------------------------------------------------------------------------------------------------------------------------------------------------------------------------------------------------------------------------------------------------------------------------------------------------------------------------------------------------------|
|  |  |  | wo-component system sensory histidine kinase<br>transcriptional regulator zraR<br>resistance protein zraP<br>acetyl-CoA acetyltransferase ACAT;<br>phosphoglycerate transport regulatory protein PgtC<br>phosphoglycerate transport system sensor protein PgtB<br>phosphoglycerate transporter protein pgdP<br>C4-dicarboxylate transport protein dctA<br>RNA polymerase sigma-54 factor rpoN<br>sensor kinase protein glrK<br>transcriptional regulator glrR<br>uptake hydrogenase small subunit hyaA<br>hydrogenase-2 small subunit hyaA<br>hydrogenase-2 large subunit hyaB<br>hydrogenase-1 large subunit hyaB<br>Ni/Fe-hydrogenase 1 b-type cytochrome subunit<br>methyl-accepting chemotaxis citrate transducer<br>chemotaxis protein methyltransferase<br>methyl-accepting chemotaxis protein II<br>aerotaxis receptor protein<br>chemotaxis protein CheA<br>chemotaxis protein CheY<br>receptor/regulator protein cheV<br>two-component response regulator ttrR<br>two-component response regulator ttrA<br>two-component response regulator ttrB<br>two-component response regulator ttrC<br>two-component sensor kinase ssrA<br>two-component sensor kinase ssrB<br>glutamate/aspartate transport ATP-binding protein GltL<br>glutamate/aspartate transport ATP-binding protein GltK<br>glutamate/aspartate transport ATP-binding protein GltJ<br>ABC transporter substrate-binding protein gltI<br>protein-glutamate methylesterase<br>cyclic AMP receptor protein,catabolite gene activator<br>terminal oxidase subunit I |
|--|--|--|---------------------------------------------------------------------------------------------------------------------------------------------------------------------------------------------------------------------------------------------------------------------------------------------------------------------------------------------------------------------------------------------------------------------------------------------------------------------------------------------------------------------------------------------------------------------------------------------------------------------------------------------------------------------------------------------------------------------------------------------------------------------------------------------------------------------------------------------------------------------------------------------------------------------------------------------------------------------------------------------------------------------------------------------------------------------------------------------------------------------------------------------------------------------------------------------------------------------------------------------------------------------------------------------------------------------------------------------------------------------------------------------------------------------------------------------------------------------------------------------------------------------------------------|

|   |                |         |    |                                                                                                                                                                                                                                                                                                                                                                                                                                                                                                                                                                                                                                                                                                                                                                                                                                                                                                                   |
|---|----------------|---------|----|-------------------------------------------------------------------------------------------------------------------------------------------------------------------------------------------------------------------------------------------------------------------------------------------------------------------------------------------------------------------------------------------------------------------------------------------------------------------------------------------------------------------------------------------------------------------------------------------------------------------------------------------------------------------------------------------------------------------------------------------------------------------------------------------------------------------------------------------------------------------------------------------------------------------|
|   |                |         |    | cytochrome d ubiquinol oxidase subunit I<br>cytochrome bd-II oxidase subunit I<br>terminal oxidase subunit II<br>cytochrome d ubiquinol oxidase subunit II<br>cytochrome oxidase subunit II<br>hypothetical protein cydX<br>outer membrane protein TolC<br>polysaccharide export protein wza<br>protein-tyrosine phosphatase wzb<br>tyrosine-protein kinase etk-wzc<br>UDP-N-acetyl-D-glucosamine 2-epimerase wecB<br>UDP-ManNAc dehydrogenase wecC<br>Pectinesterase E3.1.1.11<br>flagellin synthesis negative regulator flgM<br>tetrathionate reductase subunit A<br>tetrathionate reductase subunit B<br>outer membrane protein TolC                                                                                                                                                                                                                                                                           |
| 3 | Quorum sensing | sty0202 | 57 | autoinducer-2 production protein LuxS<br>RNA-binding protein Hfq<br>anthranilate synthase component I<br>3-deoxy-7-phosphoheptulonate synthase<br>3-deoxy-D-arabinoheptulosonate 7-phosphate synthase<br>phospho-2-dehydro-3-deoxyheptonate aldolase<br>two-component system sensor histidine kinase<br>two-component system response regulator sensor kinase protein<br>transcriptional regulator<br>flagellar transcriptional activator FlhD<br>flagellar transcriptional activator<br>KDP operon transcriptional regulatory protein<br>cell-division regulatory protein<br>amino acid transporter<br>ABC transporter permease lsrC<br>ABC transporter permease lsrD<br>ABC transporter substrate-binding protein lsrA<br>sugar kinase lsrK<br>regulatory protein lsrR<br>aldolase lsrF<br>autoinducer-2 (AI-2) modifying protein LsrG<br>high-affinity branched-chain amino acid ABC transporter permease livM |

|   |                      |          |    |                                                                                                                                                                                                                                                                                                                                                                                                                                                                                                                                                                                                                                                                                                                                                                                                                                                                                                                                                                                                                                                                                                                                                                                                                                                                                                                                                                                            |
|---|----------------------|----------|----|--------------------------------------------------------------------------------------------------------------------------------------------------------------------------------------------------------------------------------------------------------------------------------------------------------------------------------------------------------------------------------------------------------------------------------------------------------------------------------------------------------------------------------------------------------------------------------------------------------------------------------------------------------------------------------------------------------------------------------------------------------------------------------------------------------------------------------------------------------------------------------------------------------------------------------------------------------------------------------------------------------------------------------------------------------------------------------------------------------------------------------------------------------------------------------------------------------------------------------------------------------------------------------------------------------------------------------------------------------------------------------------------|
|   |                      |          |    | high-affinity branched-chain amino acid ABC transporter permease livH<br>high-affinity branched-chain amino acid ABC transporter substrate-binding protein<br>RNase II stability modulator<br>oligopeptide ABC transporter substrate-binding protein OppA<br>colanic acid capsular biosynthesis activation protein A<br>RNase II stability modulator<br>large repetitive protein<br>long-chain-fatty-acid--CoA ligase<br>cyclic AMP receptor protein,catabolite gene activator<br>zinc uptake regulation protein<br>GTP cyclohydrolase II<br>riboflavin biosynthesis protein RibD<br>hypothetical protein<br>hypothetical protein<br>oligopeptide ABC transporter permease OppB<br>oligopeptide ABC transporter ATP-binding protein OppD<br>oligopeptide ABC transporter ATP-binding protein OppF<br>inner membrane transport protein<br>ABC transporter permease<br>ABC transporter ATP-binding protein ddpD<br>ABC transporter ATP-binding protein ddpF<br>membrane protein insertase yidC<br>preprotein translocase subunit SecE<br>protein-export membrane protein secG<br>preprotein translocase subunit secY<br>hypothetical protein yajC<br>preprotein translocase subunit SecA<br>cell division protein FtsY<br>protein-export protein SecB<br>signal recognition particle protein SRP54<br>periplasmic murein peptide-binding protein MppA<br>substrate-binding transport protein |
| 4 | Bacterial chemotaxis | sty02030 | 19 | methyl-accepting chemotaxis citrate transducer<br>methyl-accepting chemotaxis protein II<br>aerotaxis receptor protein<br>maltose/maltodextrin-binding protein MalE                                                                                                                                                                                                                                                                                                                                                                                                                                                                                                                                                                                                                                                                                                                                                                                                                                                                                                                                                                                                                                                                                                                                                                                                                        |

|   |                    |          |    |                                                                                                                                                                                                                                                                                                                                                                                                                                                                                                                                                                                                                                                                                                                                                                                                                                                                                                                                                                                                                                                                                                                                                      |
|---|--------------------|----------|----|------------------------------------------------------------------------------------------------------------------------------------------------------------------------------------------------------------------------------------------------------------------------------------------------------------------------------------------------------------------------------------------------------------------------------------------------------------------------------------------------------------------------------------------------------------------------------------------------------------------------------------------------------------------------------------------------------------------------------------------------------------------------------------------------------------------------------------------------------------------------------------------------------------------------------------------------------------------------------------------------------------------------------------------------------------------------------------------------------------------------------------------------------|
|   |                    |          |    | D-ribose-binding periplasmic protein<br>D-galactose-binding periplasmic protein<br>periplasmic dipeptide transport protein<br>chemotaxis protein CheA<br>purine binding chemotaxis protein<br>chemotaxis protein CheY<br>chemotaxis protein CheZ<br>protein-glutamate methylesterase<br>receptor/regulator protein<br>chemotaxis protein methyltransferase<br>flagellar motor switch protein FliG<br>flagellar motor switch protein FliM<br>flagellar motor switch protein FliN<br>motility protein A<br>motility protein B                                                                                                                                                                                                                                                                                                                                                                                                                                                                                                                                                                                                                          |
| 5 | Flagellar assembly | sty02040 | 45 | RNA polymerase sigma-70 factor<br>flagellar hook-basal body complex protein FliE<br>flagellar basal-body M-ring protein<br>flagellar motor switch protein FliG<br>flagellar assembly protein FliH<br>flagellum-specific ATP synthase<br>flagellar protein FliJ<br>flagellar hook-length control protein<br>flagellar basal body-associated protein FliL<br>flagellar motor switch protein FliM<br>flagellar motor switch protein FliN<br>flagellar protein FliO<br>flagellar biosynthetic protein FliP<br>flagellar biosynthetic protein FliQ<br>flagellar biosynthetic protein FliR<br>flagellar protein FlhE<br>flagellar biosynthesis protein FlhA<br>flagellar biosynthetic protein FlhB<br>flagellar basal body P-ring protein FlgA<br>flagellar basal-body rod protein FlgB<br>flagellar basal-body rod protein FlgC<br>flagellar hook formation protein FlgD<br>flagellar hook protein FlgE<br>flagellar basal-body rod protein FlgF<br>flagellar basal-body rod protein FlgG<br>flagellar L-ring protein<br>flagellar P-ring protein<br>flagellar protein FlgJ<br>flagellar hook-associated protein 1<br>flagellar hook-associated protein 3 |



|   |                        |          |    |                                                                                                                                                                                                                                                                                                                                                                                                                                                                                                                                                                                                                                                                                 |
|---|------------------------|----------|----|---------------------------------------------------------------------------------------------------------------------------------------------------------------------------------------------------------------------------------------------------------------------------------------------------------------------------------------------------------------------------------------------------------------------------------------------------------------------------------------------------------------------------------------------------------------------------------------------------------------------------------------------------------------------------------|
|   |                        |          |    | flagellin K02406 fliC; flagellin<br>flagellar hook associated protein 2<br>flagellar protein FliS<br>flagellar protein FliT<br>motility protein B<br>motility protein A<br>flagellin synthesis negative regulator<br>flagella synthesis protein FlgN<br>cystine-binding periplasmic protein<br>flagella biosynthesis regulator FliZ<br>RNA polymerase sigma-54 factor<br>flagellar transcriptional activator FlhD<br>flagellar transcriptional activator<br>RNA polymerase sigma transcription factor<br>for flagellar operon                                                                                                                                                   |
| 6 | beta-Lactam resistance | sty01501 | 18 | outer membrane protein F<br>outer membrane protein C<br>mucopeptide transporter AmpG<br>glycosyl hydrolase<br>oligopeptide ABC transporter substrate-binding protein OppA<br>periplasmic murein peptide-binding protein MppA<br>oligopeptide ABC transporter permease OppB<br>oligopeptide ABC transporter ATP-binding protein OppD<br>oligopeptide ABC transporter ATP-binding protein OppF<br>tRNA-splicing ligase RtcB<br>outer membrane protein TolC<br>beta-lactamase<br>acriflavin resistance protein A<br>acriflavin resistance protein B<br>penicillin-binding protein 1A<br>penicillin-binding protein 2<br>penicillin-binding protein 3<br>penicillin-binding protein |
| 7 | Vancomycin resistance  | sty01502 | 8  | D-alanyl-D-alanine dipeptidase<br>D-alanine:D-alanine ligase B<br>D-alanine:D-alanine ligase A<br>alanine racemase ddlA<br>alanine racemase alr<br>alanine racemase dadX<br>UDP-N-acetylmuramoylalanyl-D-glutamyl-2,6-diaminopimelate--D-alan alanyl ligase                                                                                                                                                                                                                                                                                                                                                                                                                     |

|    |                                                     |          |    |                                                                                                                                                                                                                                                                                                                                                                                                                                                                                                                                                                                                                                                                                                                                                   |
|----|-----------------------------------------------------|----------|----|---------------------------------------------------------------------------------------------------------------------------------------------------------------------------------------------------------------------------------------------------------------------------------------------------------------------------------------------------------------------------------------------------------------------------------------------------------------------------------------------------------------------------------------------------------------------------------------------------------------------------------------------------------------------------------------------------------------------------------------------------|
|    |                                                     |          |    | UDP-N-acetylglucosamine:N-acetylmuramyl-(pentapeptide) pyrophosphoryl-undecaprenol N-acetylglucosamine transferase                                                                                                                                                                                                                                                                                                                                                                                                                                                                                                                                                                                                                                |
| 8  | Cationic antimicrobial peptide (CAMP) resistance    | sty01503 | 15 | <p>sensor protein PhoQ</p> <p>transcriptional regulator PhoP</p> <p>KDO phosphoethanolamine transferase</p> <p>antimicrobial peptide resistance and lipid A acylation protein</p> <p>lipopolysaccharide biosynthesis protein arnB</p> <p>lipopolysaccharide modification protein pmrF</p> <p>lipopolysaccharide modification protein arnA</p> <p>two-component sensor kinase</p> <p>peptide ABC transporter substrate-binding protein</p> <p>two-component response regulatory protein</p> <p>thiol:disulfide interchange protein</p> <p>4-deoxy-4-formamido-L-arabinose-phosphoundecaprenol deformylase</p> <p>4-amino-4-deoxy-L-arabinose lipid A transferase</p> <p>acyl-[acyl-carrier-protein]--UDP-N-acetylglucosamine O-acyltransferase</p> |
| 9  | Phenylalanine, tyrosine and tryptophan biosynthesis | sty00400 | 17 | <p>3-deoxy-7-phosphoheptulonate synthase</p> <p>3-deoxy-D-arabinoheptulosonate 7-phosphate synthase</p> <p>phospho-2-dehydro-3-deoxyheptonate aldolase</p> <p>3-dehydroquinate synthase</p> <p>3-dehydroquinase</p> <p>shikimate dehydrogenase</p> <p>shikimate 5-dehydrogenase</p> <p>3-phosphoshikimate 1-carboxyvinyltransferase</p> <p>chorismate synthase</p> <p>anthranilate synthase component I</p> <p>tryptophan synthase subunit alpha</p> <p>tryptophan synthase subunit beta</p> <p>bifunctional chorismate mutase/prephenate dehydrogenase</p> <p>decarboxylase</p> <p>catalase</p> <p>4-hydroxyphenylacetate 3-monooxygenase</p> <p>coupling protein</p>                                                                            |
| 10 | Taurine and hypotaurine metabolism                  | sty00430 | 3  | <p>gamma-glutamyltranspeptidase</p> <p>phosphate acetyltransferase</p> <p>acetate kinase</p>                                                                                                                                                                                                                                                                                                                                                                                                                                                                                                                                                                                                                                                      |

|    |                                 |          |    |                                                                                                                                                                                                                                                                                                                                                                                                                                                                                                                                                                                                                                                                                                                                                                                                                                                                                                                                                                                                                                                                                                                                                                                                                                                                                                                                                                                                                                                                                                                     |
|----|---------------------------------|----------|----|---------------------------------------------------------------------------------------------------------------------------------------------------------------------------------------------------------------------------------------------------------------------------------------------------------------------------------------------------------------------------------------------------------------------------------------------------------------------------------------------------------------------------------------------------------------------------------------------------------------------------------------------------------------------------------------------------------------------------------------------------------------------------------------------------------------------------------------------------------------------------------------------------------------------------------------------------------------------------------------------------------------------------------------------------------------------------------------------------------------------------------------------------------------------------------------------------------------------------------------------------------------------------------------------------------------------------------------------------------------------------------------------------------------------------------------------------------------------------------------------------------------------|
| 11 | Lipopolysaccharide biosynthesis | sty00540 | 46 | <p>acyl-[acyl-carrier-protein]--UDP-N-acetylglucosamine O-acyltransferase<br/> UDP-3-O-[3-hydroxymyristoyl] N-acetylglucosamine deacetylase lpxC<br/> UDP-3-O-[3-hydroxymyristoyl] glucosamine N-acyltransferase lpxC<br/> lipid-A-disaccharide synthase lpxB<br/> tetraacyldisaccharide 4'-kinase lpxK<br/> D-arabinose 5-phosphate isomerase kdsD<br/> 2-dehydro-3-deoxyphosphooctonate aldolase kdsA<br/> 3-deoxy-D-manno-octulosonate 8-phosphate phosphatase KdsC<br/> 3-deoxy-manno-octulosonate cytidyltransferase kdsB<br/> 3-deoxy-D-manno-octulosonic acid transferase kdtA<br/> lipid A biosynthesis lauroyl acyltransferase htrB<br/> lipid A biosynthesis lauroyl acyltransferase ipxM<br/> membrane-bound beta-hydroxylase lpxO<br/> outer membrane protein lpxR<br/> hypothetical protein lpxT<br/> lipid A phosphoethanolamine transferase eptA<br/> KDO phosphoethanolamine transferase eptB<br/> antimicrobial peptide resistance and lipid A pagP<br/> 4-amino-4-deoxy-L-arabinose lipid A transferase<br/> acyltransferase lpxP<br/> phosphoheptose isomerase gmhA<br/> ADP-heptose synthase gmhC<br/> D,D-heptose 1,7-bisphosphate phosphatase gmhB<br/> ADP-L-Glycero-D-mannoheptose-6-epimerase gmhD<br/> ADP-heptose--LPS heptosyltransferase waaC;<br/> ADP-heptose--LPS heptosyltransferase waaF<br/> lipopolysaccharide core biosynthesis protein<br/> LPS core phosphoethanolamine transferase eptC<br/> lipopolysaccharide core biosynthesis protein<br/> glycosyltransferase waaH</p> |
|----|---------------------------------|----------|----|---------------------------------------------------------------------------------------------------------------------------------------------------------------------------------------------------------------------------------------------------------------------------------------------------------------------------------------------------------------------------------------------------------------------------------------------------------------------------------------------------------------------------------------------------------------------------------------------------------------------------------------------------------------------------------------------------------------------------------------------------------------------------------------------------------------------------------------------------------------------------------------------------------------------------------------------------------------------------------------------------------------------------------------------------------------------------------------------------------------------------------------------------------------------------------------------------------------------------------------------------------------------------------------------------------------------------------------------------------------------------------------------------------------------------------------------------------------------------------------------------------------------|

|    |                                         |          |    |                                                                                                                                                                                                                                                                                                                                                                                                                                                                                                                                                                                                                                                                                                         |
|----|-----------------------------------------|----------|----|---------------------------------------------------------------------------------------------------------------------------------------------------------------------------------------------------------------------------------------------------------------------------------------------------------------------------------------------------------------------------------------------------------------------------------------------------------------------------------------------------------------------------------------------------------------------------------------------------------------------------------------------------------------------------------------------------------|
|    |                                         |          |    | lipopolysaccharide core biosynthesis protein way<br>3-deoxy-D-manno-oct-2-ulosonate III transferase WaaZ<br>lipopolysaccharide core biosynthesis protein<br>lipopolysaccharide 1,6-galactosyltransferase<br>lipopolysaccharide 1,2-N-acetylglucosaminetransferase<br>lipopolysaccharide 1,3-galactosyltransferase<br>lipopolysaccharide 1,2-glucosyltransferase waaJ<br>O-antigen ligase waaL<br>UDP-2,3-diacetylglucosamine hydrolase lpxH<br>2-dehydro-3-deoxyphosphooctonate aldolase<br>3-deoxy-manno-octulosonate cytidyltransferase<br>antimicrobial peptide resistance<br>phosphoheptose isomerase<br>lipopolysaccharide 1,3-galactosyltransferase<br>lipopolysaccharide 1,2-glucosyltransferase |
| 12 | O-Antigen nucleotide sugar biosynthesis | sty00541 | 14 | UTP-glucose-1-phosphate uridylyltransferase<br>glucose-1-phosphate uridylyltransferase<br>UDP-glucose 4-epimerase gale<br>UDP-glucose 6-dehydrogenase UGDH<br>TDP-glucose pyrophosphorylase rfbA<br>glucose-1-phosphate thymidylyltransferase<br>dTDP-glucose 4,6-dehydratase<br>UDP-N-acetylglucosamine epimerase<br>dTDP-4-dehydrorhamnose reductase<br>lipopolysaccharide biosynthesis protein wecE<br>dTDP-4-dehydrorhamnose 3,5-epimerase<br>dehydratase RfbH<br>reductase RfbI<br>phosphomannomutase                                                                                                                                                                                              |
| 13 | Peptidoglycan biosynthesis              | sty00550 | 2  | Esterase<br>monofunctional biosynthetic peptidoglycan transglycosylase                                                                                                                                                                                                                                                                                                                                                                                                                                                                                                                                                                                                                                  |
| 14 | Pantothenate and CoA biosynthesis       | sty00770 | 7  | 3-methyl-2-oxobutanoate hydroxymethyltransferase<br>pantoate:beta-alanine ligase<br>pantothenate kinase<br>phosphopantetheine adenylyltransferase<br>holo-[acyl-carrier protein] synthase<br>4'-phosphopantetheinyl transferase<br>aspartate 1-decarboxylase                                                                                                                                                                                                                                                                                                                                                                                                                                            |

|    |                                    |          |    |                                                                                                                                                                                                                                                                                                                                                                                                                                                                                                                                                                                                                                                                                                                                                                                                                                                                                                                    |
|----|------------------------------------|----------|----|--------------------------------------------------------------------------------------------------------------------------------------------------------------------------------------------------------------------------------------------------------------------------------------------------------------------------------------------------------------------------------------------------------------------------------------------------------------------------------------------------------------------------------------------------------------------------------------------------------------------------------------------------------------------------------------------------------------------------------------------------------------------------------------------------------------------------------------------------------------------------------------------------------------------|
| 15 | Polyketide sugar unit biosynthesis | sty00523 | 1  | dTDP-4-dehydrorhamnose 3,5-epimerase                                                                                                                                                                                                                                                                                                                                                                                                                                                                                                                                                                                                                                                                                                                                                                                                                                                                               |
| 16 | Monobactam biosynthesis            | sty00261 | 2  | aspartate-semialdehyde dehydrogenase<br>4-hydroxy-tetrahydrodipicolinate reductase                                                                                                                                                                                                                                                                                                                                                                                                                                                                                                                                                                                                                                                                                                                                                                                                                                 |
| 17 | Streptomycin biosynthesis          | sty00521 | 1  | dTDP-4-dehydrorhamnose 3,5-epimerase                                                                                                                                                                                                                                                                                                                                                                                                                                                                                                                                                                                                                                                                                                                                                                                                                                                                               |
| 18 | Benzoate degradation               | sty00362 | 1  | n-hydroxybenzoate hydroxylase                                                                                                                                                                                                                                                                                                                                                                                                                                                                                                                                                                                                                                                                                                                                                                                                                                                                                      |
| 19 | Aminobenzoate degradation          | sty00627 | 1  | flavin prenyltransferase                                                                                                                                                                                                                                                                                                                                                                                                                                                                                                                                                                                                                                                                                                                                                                                                                                                                                           |
| 20 | Nitrotoluene degradation           | sty00633 | 2  | oxygen-insensitive NAD(P)H nitroreductase<br>N-ethylmaleimide reductase                                                                                                                                                                                                                                                                                                                                                                                                                                                                                                                                                                                                                                                                                                                                                                                                                                            |
| 21 | Methane metabolism                 | sty00680 | 30 | Esterase frmB<br>formate dehydrogenase-O, major subunit<br>formate dehydrogenase-O subunit beta<br>phosphoenolpyruvate carboxylase<br>fructose 1,6-bisphosphate aldolase<br>6-phosphofructokinase isozyme<br>1-phosphofructokinase<br>trimethylamine-N-oxide reductase<br>chaperone protein TorD<br>acetate kinase<br>serine hydroxymethyltransferase<br>phosphate acetyltransferase<br>serine hydroxymethyltransferase<br>enolase<br>malate dehydrogenase<br>6-phosphofructokinase<br>acetyl-coenzyme A synthetase<br>phosphoenolpyruvate synthase<br>2,3-bisphosphoglycerate-dependent<br>phosphoglycerate mutase<br>phosphoglycerate mutase 2<br>D-3-phosphoglycerate dehydrogenase<br>3-phosphoserine/phosphohydroxythreonine<br>aminotransferase<br>phosphoserine phosphatase<br>glycerol metabolic protein<br>phosphoenolpyruvate synthase<br>2,3-bisphosphoglycerate-independent<br>phosphoglycerate mutase |
| 22 | Cyanoamino acid metabolism         | sty00460 | 1  | periplasmic beta-glucosidase                                                                                                                                                                                                                                                                                                                                                                                                                                                                                                                                                                                                                                                                                                                                                                                                                                                                                       |
